# Supplementary material for: Osteoblasts Promote Prostate Cancer Cell Proliferation Through Androgen Receptor Independent Mechanisms
Source: PubMed Central journal article supplement (PMC8711264; doi:10.3389/fonc.2021.789885), 2021-12-13

# AR luciferase activity

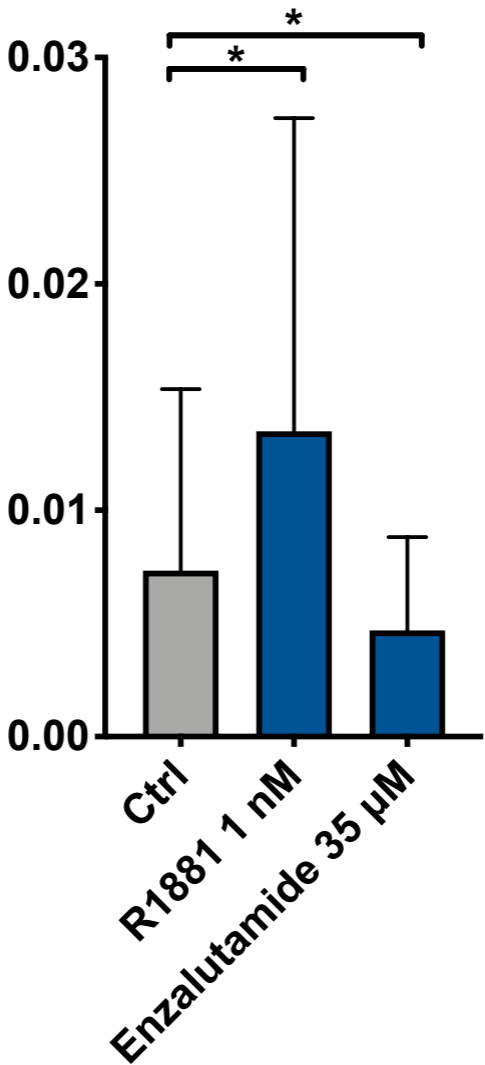

Supplement: DataSheet_1.pdf [file DataSheet_1.pdf]
