# Supplementary material for: Osteoblasts Promote Prostate Cancer Cell Proliferation Through Androgen Receptor Independent Mechanisms
Source: PubMed Central journal article supplement (PMC8711264; doi:10.3389/fonc.2021.789885), 2021-12-13
Supplement: DataSheet_2.pdf [file DataSheet_2.pdf]

| <b>Raw data G0 cells (Figure 4)</b> |       |       |       |       |
|-------------------------------------|-------|-------|-------|-------|
|                                     | Exp 1 | Exp 2 | Exp 3 | Exp 4 |
| C4-2B CM                            | 38.8  | 37.7  | 51    |       |
| OCM                                 | 26.6  | 34.6  | 18.4  | 29.4  |

| <b>Raw data G1 cells (Figure 4)</b> |       |       |       |       |
|-------------------------------------|-------|-------|-------|-------|
|                                     | Exp 1 | Exp 2 | Exp 3 | Exp 4 |
| C4-2B CM                            | 48.8  | 48.1  | 36.4  |       |
| OCM                                 | 58.3  | 50.6  | 64    | 54.4  |

| <b>Raw data S-G2-M cells (Figure 4)</b> |       |       |       |       |
|-----------------------------------------|-------|-------|-------|-------|
|                                         | Exp 1 | Exp 2 | Exp 3 | Exp 4 |
| C4-2B CM                                | 11.3  | 13.2  | 11.1  |       |
| OCM                                     | 15.3  | 16.7  | 17.2  | 17.3  |

| <b>Raw data S-G2-M cells (Figure 8)</b> |       |       |       |       |       |       |
|-----------------------------------------|-------|-------|-------|-------|-------|-------|
|                                         | Exp 1 | Exp 2 | Exp 3 | Exp 4 | Exp 5 | Exp 6 |
| Ctrl                                    | 7.11  | 6.15  | 8.78  | 7.56  | 7.8   | 8.13  |
| MMP-1 0.1 ng/ml                         | 8.2   | 7.63  | 9.15  | 7.8   | 7.85  | 9.35  |
| MMP-1 1 ng/ml                           | 8.5   | 7.83  | 9.87  | 8.1   | 8.47  | 9.47  |
| MMP-1 10 ng/ml                          | 10.03 | 9.08  | 9.87  | 8.25  | 8.49  | 10.15 |

| <b>Raw data S-G2-M cells (Figure 8)</b> |       |       |       |
|-----------------------------------------|-------|-------|-------|
|                                         | Exp 1 | Exp 2 | Exp 3 |
| Ctrl                                    | 9.1   | 10.5  | 11.7  |
| Vorapaxar 0.01 $\mu$ M                  | 8     | 9     | 8.5   |
| Vorapaxar 0.1 $\mu$ M                   | 7.6   | 6.6   | 7     |
| Vorapaxar 1 $\mu$ M                     | 7.14  | 6     | 5.8   |

| <b>Raw data S-G2-M cells (Supplementary Figure 3)</b> |       |       |       |       |       |       |       |
|-------------------------------------------------------|-------|-------|-------|-------|-------|-------|-------|
|                                                       | Exp 1 | Exp 2 | Exp 3 | Exp 4 | Exp 5 | Exp 6 | Exp 7 |
| Ctrl                                                  | 8.11  | 5.15  | 4.25  | 8.78  | 6.56  | 7.8   | 9.13  |
| DKK-1 0.1 ng/ml                                       | 8.3   | 4.53  | 8.77  |       |       |       |       |
| DKK-1 1 ng/ml                                         | 7.59  | 5.43  | 8.42  |       |       |       |       |
| DKK-1 10 ng/ml                                        | 7.83  | 5.49  | 8.49  |       |       |       |       |
| IGFBP-7 0.5 ng/ml                                     | 6.89  | 7.57  | 7.36  |       |       |       |       |
| IGFBP-7 5 ng/ml                                       | 7.95  | 6.52  | 6.98  |       |       |       |       |
| IGFBP-7 50 ng/ml                                      | 6.8   | 7.89  | 8.1   |       |       |       |       |
| EDA-A2 0.1 ng/ml                                      | 6.94  | 5.14  | 8.39  |       |       |       |       |
| EDA-A2 1 ng/ml                                        | 7.05  | 6.23  | 8.26  |       |       |       |       |
| EDA-A2 10 ng/ml                                       | 7.71  | 5.98  | 7.46  |       |       |       |       |
