# Supplementary material for: Osteoblasts Promote Prostate Cancer Cell Proliferation Through Androgen Receptor Independent Mechanisms
Source: PubMed Central journal article supplement (PMC8711264; doi:10.3389/fonc.2021.789885), 2021-12-13

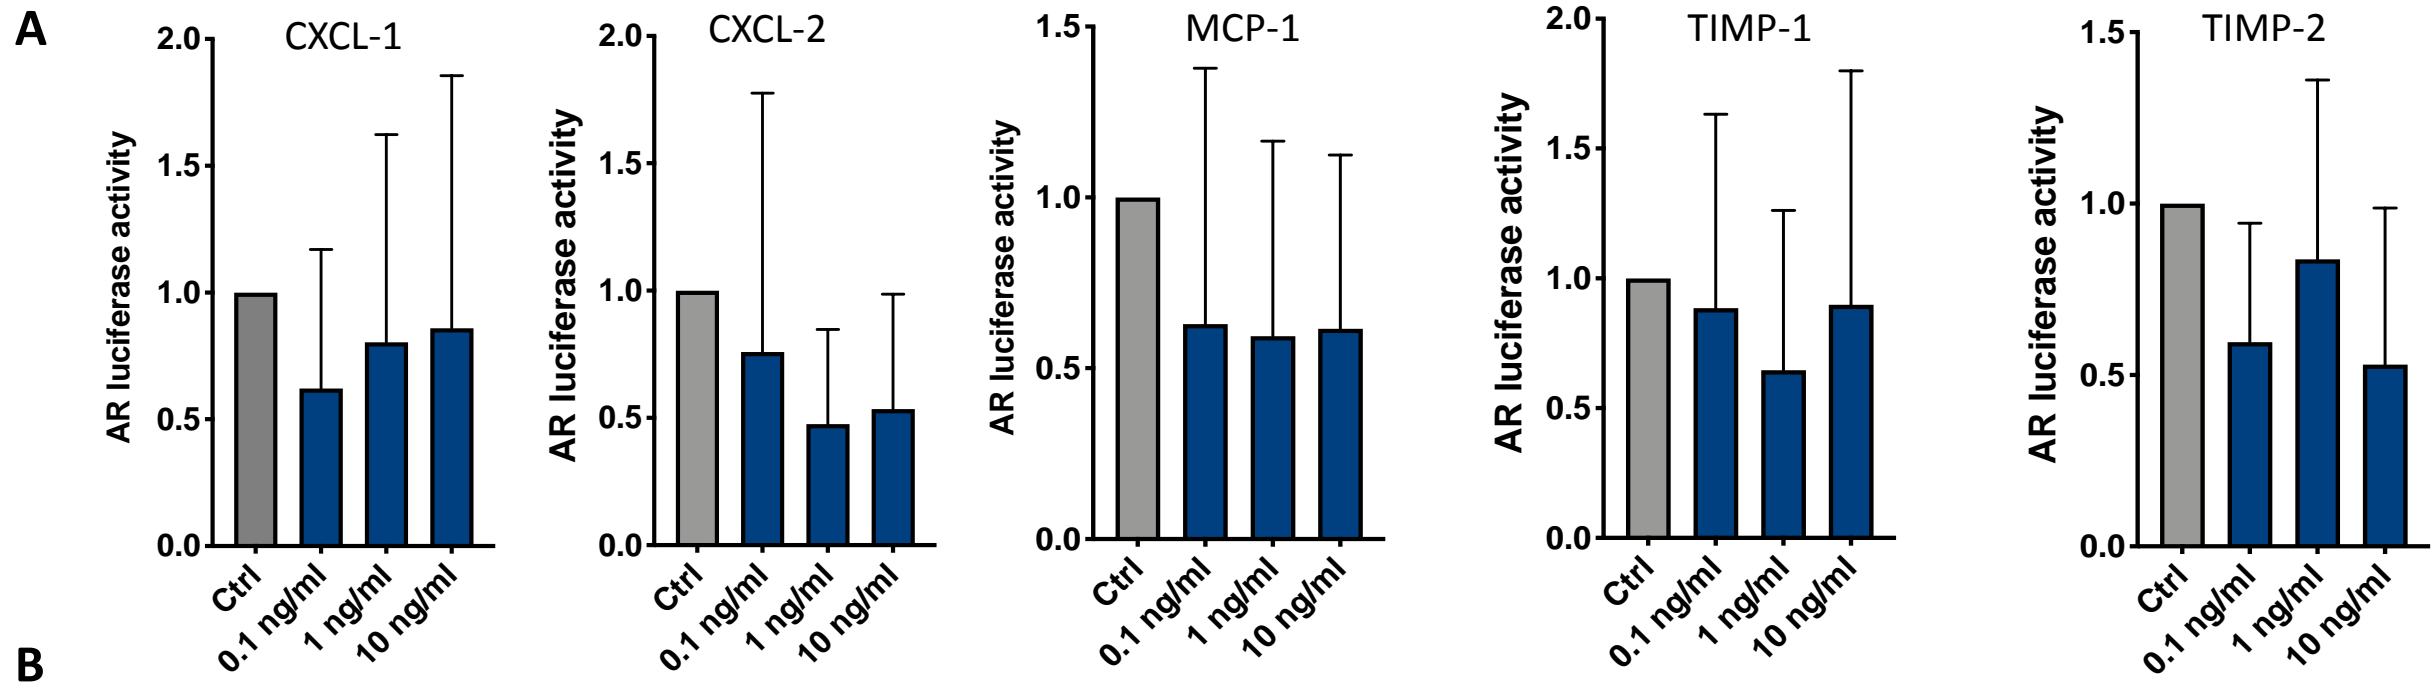

**B**

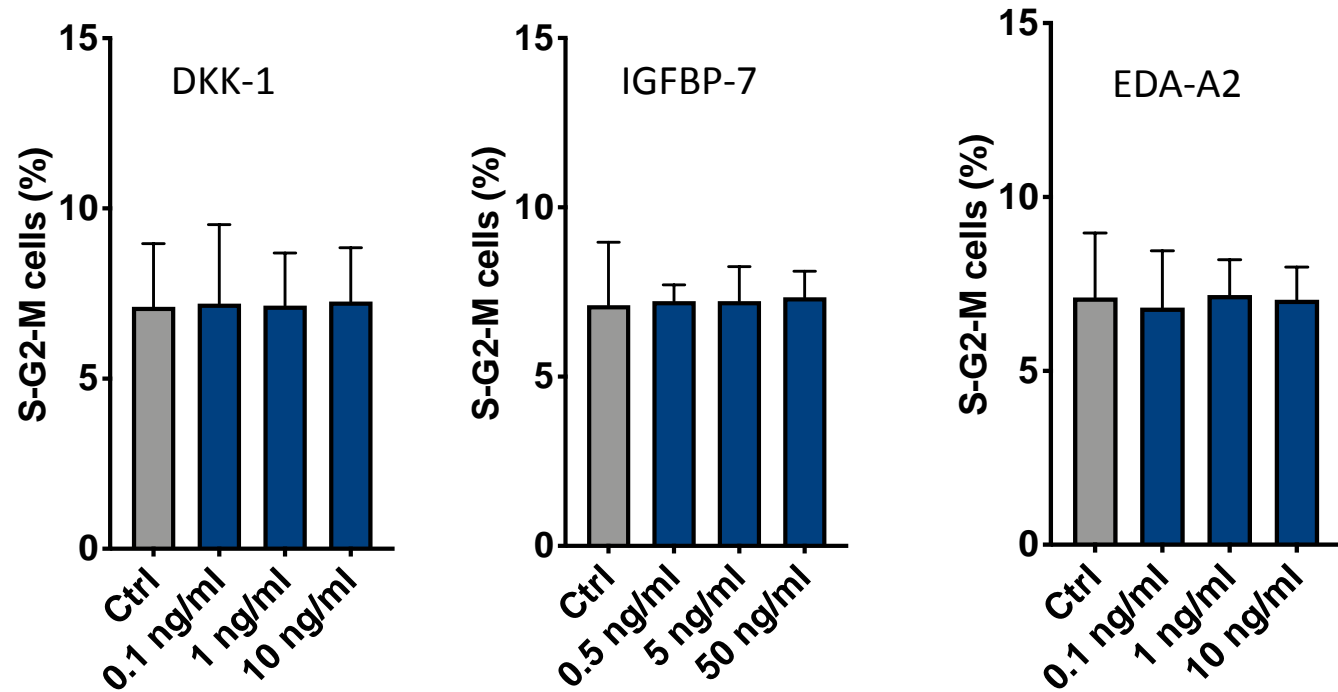

Supplement: DataSheet_3.pdf [file DataSheet_3.pdf]
