# Supplementary material for: Osteoblasts Promote Prostate Cancer Cell Proliferation Through Androgen Receptor Independent Mechanisms
Source: PubMed Central journal article supplement (PMC8711264; doi:10.3389/fonc.2021.789885), 2021-12-13

mRNA (fold change)

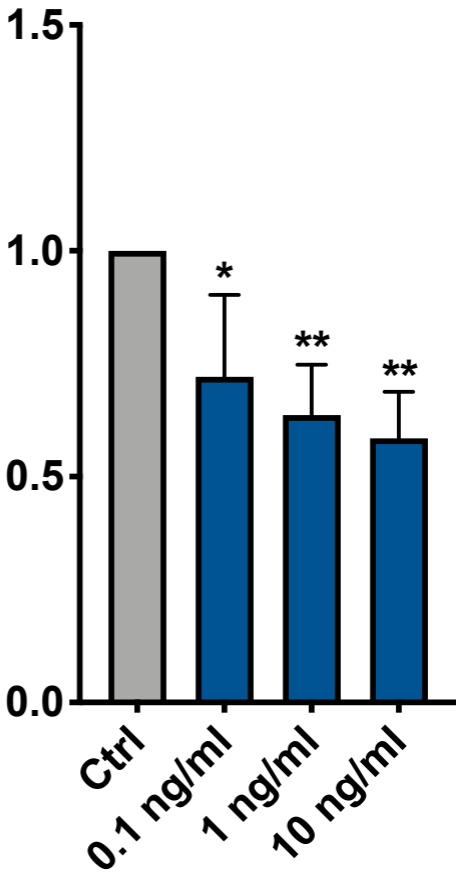

Supplement: DataSheet_4.pdf [file DataSheet_4.pdf]
